# Supplementary material for: α Cell Function and Gene Expression Are Compromised in Type 1 Diabetes
Source: PubMed Central journal article supplement — Cell Rep. Author manuscript; Available in PMC 2019 Feb 8. (PMC6368357; doi:10.1016/j.celrep.2018.02.032), 2018-03-06
Supplement: NIHMS963683-supplement-supplement_1.pdf [file NIHMS963683-supplement-supplement_1.pdf]

## Supplemental Information

### $\alpha$ Cell Function and Gene Expression

### Are Compromised in Type 1 Diabetes

Marcela Brissova, Rachana Haliyur, Diane Saunders, Shristi Shrestha, Chunhua Dai, David M. Blodgett, Rita Bottino, Martha Campbell-Thompson, Radhika Aramandla, Gregory Poffenberger, Jill Lindner, Fong Cheng Pan, Matthias G. von Herrath, Dale L. Greiner, Leonard D. Shultz, May Sanyoura, Louis H. Philipson, Mark Atkinson, David M. Harlan, Shawn E. Levy, Nripesh Prasad, Roland Stein, and Alvin C. Powers

## SUPPLEMENTAL EXPERIMENTAL PROCEDURES

### Contact for reagent and resource sharing

Further information and requests for resources and reagents should be directed to and will be fulfilled by the lead contact, Marcela Brissova (marcela.brissova@vanderbilt.edu) or Alvin Powers (al.powers@vanderbilt.edu).

### DNA sequencing

DNA samples were sequenced using a custom designed next-generation sequencing (NGS) targeted panel that includes 148 genes implicated in monogenic forms of diabetes (neonatal diabetes and MODY), insulin resistance, lipodystrophy, obesity, rare syndromic forms of diabetes, and diabetes candidate genes (Alkorta-Aranburu et al., 2016). The targeted NGS approach was based on the SureSelect enrichment (Agilent Technologies) protocol followed by MiSeq Illumina NGS. Data quality was assessed using FastQC. Variants were called using The Genome Analysis Toolkit (GATK) HaploTypeCaller v3.3 and assigned to the transcripts of interest. Variants were then annotated in regards to their positions in transcripts of interest, position relative to the coding sequence, consequence for the protein or mRNA and a collection of direct and indirect evidentiary tools and databases including NCBI dbSNP, 1000 Genomes Project, Exome Sequencing Project (ESP), GERP, Conseq, PolyPhen-2, SIFT and the Human Gene Mutation Database (HGMD). All variants were interpreted according to the guidelines of the American College of Medical Genetics. All likely pathogenic variants identified by NGS were confirmed by Sanger sequencing.

### Measurement of endocrine cell populations

Islet dissociation and intracellular antibody staining used a previously described protocol (Blodgett et al., 2015). Anti-insulin (Gallus Immunotech), anti-chicken allophycocyanin, (Jackson ImmunoResearch), anti-glucagon (Sigma-Aldrich) conjugated with Zenon Pacific Blue (Invitrogen), and anti-somatostatin (LSBio) conjugated with Zenon Alexa Fluor 488 (Invitrogen) were used to stain  $\beta$ ,  $\alpha$ , and  $\delta$  cells, respectively (**Resources Table**). Dissociated islet cell preparations were analyzed using a BD Biosciences FACS Aria II Cell Sorter (University of Massachusetts Medical School Flow Core Laboratory). Cellular debris was eliminated from islet preparations using a forward scatter versus side scatter size gate.

### Assessment of pancreatic islet function *in vitro*

Function of islets from T1D donors and normal controls (**Tables 1** and **S1**) was studied in a dynamic cell perfusion system at a perfusate flow rate of 1 mL/min (Kayton et al., 2015). The effluent was collected at 3-minute intervals using an automatic fraction collector. Insulin and glucagon concentrations in each perfusion fraction and islet extracts were measured by radioimmunoassay (Millipore).

### qRT-PCR of isolated pancreatic islets

Quantitative reverse transcription polymerase chain reaction (qRT-PCR) was performed using the primer-probe approach from Applied Biosystems (Life Technologies) with *18S* and *ACTB* endogenous controls using Minimum Information for Publication of Quantitative Real-Time PCR Experiments (MIQE) guidelines as described (Brissova et al., 2014). All primers are listed in **Resources Table**. Gene expression in recent-onset T1D donors was compared to normal controls (**Tables 1** and **S1**). We were able to detect *INS* mRNA in T1D islets by RT-PCR and found that it was reduced to  $19 \pm 7\%$  compared to controls.

### **$\alpha$ cell sorting by flow cytometry for RNA-sequencing**

Human islets were dispersed using a modified protocol as described previously (Aamodt et al., 2016). Briefly, 0.025% trypsin was used to disperse cells and reaction was quenched with modified RPMI medium (10% FBS, 1% Penn/Strep, 5 mM glucose). Cells were washed in the same medium and counted on a hemocytometer, then transferred to FACS buffer (2 mM EDTA, 2% FBS, 1X PBS). Indirect antibody labeling was completed via two sequential incubation periods at 4°C, with one wash in FACS buffer following each incubation. Primary and secondary antibodies, listed in **Resources Table**, have been characterized previously and used to isolate high-quality RNA from  $\alpha$  cells (Dorrell et al., 2016). Appropriate single color compensation controls were run alongside samples. Prior to sorting, propidium iodide (0.05  $\mu$ g/100,000 cells; BD Biosciences, San Jose, CA) was added to samples for non-viable cell exclusion. Flow analysis was performed using an LSRFortessa cell analyzer (BD Biosciences), and a FACS Aria III cell sorter (BD Biosciences) was used for FACS. Analysis of flow cytometry data was completed using FlowJo 10.1.5 (Tree Star).

### **Islet transplantation and assessment of grafts**

T1D islets were transplanted into immunodeficient 10-12 week old NOD-*scid-IL2 $\gamma$ <sup>null</sup>* (NSG) male mice. Human islets from three normal donors with an average age of 37 years (range from 20 to 53 years) and average BMI of 25.1 (range from 21.7 to 28.2) were obtained through IIDP (**Table S1**). NSG mice were transplanted beneath the renal capsule with 500 – 600 normal or T1D islet equivalents (prepared as described above). Each set of islets was transplanted into 7-8 mice. Islets were allowed to engraft for 1 month and then mice were randomized for an additional 1-month treatment with either phosphate buffered saline (PBS) or exendin-4 (Ex), which were administered using an Alzet minipump (model 1004 with a pump volume of 100  $\mu$ L, Durect Corporation). Ex-4 (California Peptide) was reconstituted in PBS without Ca<sup>2+</sup> and Mg<sup>2+</sup> and loaded into Alzet pump at concentration of 0.9 mg/mL. Ex-4 in plasma was measured by EIA (Phoenix Pharmaceuticals) and reached concentration of  $4.4 \pm 0.2$  ng/mL (n=8 mice). Insulin secretion in transplanted human islets was assessed by intraperitoneal administration of glucose (2 g/kg of body weight) and arginine (2 g/kg of body weight) prior to and after Ex-4/PBS treatment. Human insulin in plasma was measured by species-specific radioimmunoassay (Millipore).

### **Immunohistochemical analysis**

Immunohistochemical analysis of pancreas was performed on serial 5- $\mu$ m cryosections from multiple blocks from head, body and tail regions as described (Brissova et al., 2014). Kidneys bearing islet transplants were collected and then 5- $\mu$ m cryosections from 5-6 different depths of each graft were labeled for immunofluorescence as described (Brissova et al., 2014). Primary antibodies to all antigens and their working dilutions are listed in the **Resources Table**. The antigens were visualized using appropriate secondary antibodies listed in the **Resources Table**. Tyramide Signal Amplification (Perkin Elmer) was used to visualize ARX and NKX2.2 labeling. Digital images were acquired with a Zeiss LSM510 META laser scanning confocal microscope (Carl Zeiss).

### **RNA-sequencing**

Sorted  $\alpha$  cells (5,000-125,000) were added to 200  $\mu$ L lysis/binding solution in the RNAqueous micro-scale phenol-free total RNA isolation kit (Ambion). Trace DNA was removed with TURBO DNA-free (Ambion), RNA integrity was evaluated (Agilent 2100 Bioanalyzer; control,  $8.36 \pm 0.22$  RIN, n=5 donors; T1D,  $7.97 \pm 0.32$  RIN, n=3 donors), and high-integrity total RNA was amplified (Ovation system; NuGen Technologies) per standard protocol as described previously (Brissova et al., 2014). Amplified cDNA was sheared to target 200bp fragment size and libraries were

prepared using NEBNext DNA Library Prep (New England BioLabs). 50bp Paired End (PE) sequencing was performed on an Illumina HiSeq 2500 using traditional Illumina methods (Malone and Oliver, 2011) to generate approximately 50 million reads per sample. Raw reads were mapped to the reference human genome hg19 using TopHat v2.1 (Trapnell et al., 2009). Aligned reads were then imported onto the Avadis NGS analysis platform (Strand life Sciences) and filtered based on read quality followed by read statistics to remove duplicates. Transcript abundance was quantified using the TMM (Trimmed Mean of M-values) algorithm (Dillies et al., 2012; Robinson and Oshlack, 2010) as the normalization method.

### **Quantification of cellular protein expression**

Histopathology reviews were conducted on the whole slide digital images. Protein expression of nuclear factors in  $\alpha$  and  $\beta$  cells was quantified using MetaMorph 7.1 imaging software (Molecular Devices) using manual cell counting (Brissova et al., 2014) where an average of  $351 \pm 73$   $\alpha$  cells and  $861 \pm 141$   $\beta$  cells were counted per normal donor ( $n=7$ ), and average of  $718 \pm 50$   $\alpha$  cells and  $45 \pm 17$   $\beta$  cells were counted per T1D donor ( $n=4$ ) for each transcription factor.

### **RNA-sequencing analysis**

Genes with normalized expression values less than 25 were removed prior to differential expression analysis between control and T1D groups. Fold change (cutoff  $\geq \pm 1.5$ ) was calculated based on p-value estimated by z-score calculations (cutoff 0.05) as determined by Benjamini Hochberg false discovery rate (FDR) correction of 0.05 (Benjamini and Hochberg, 1995). Differentially expressed genes were further analyzed through Ingenuity Pathway Analysis (IPA, Qiagen) (**Figure S4C, Table S3**) and Gene Ontology (GO) analysis using DAVID v6.8 (Huang et al., 2009) (**Figures 4B and S4D, Table S4**).

## RESOURCES TABLE

| REAGENT or RESOURCE                                            | SOURCE                                                 | IDENTIFIER                           |
|----------------------------------------------------------------|--------------------------------------------------------|--------------------------------------|
| <b>Antibodies</b>                                              |                                                        |                                      |
| Rabbit anti-ARX (1:1000)                                       | Beta Cell Biology Consortium (BCBC)/Patrick Collombat  | N/A                                  |
| Rabbit anti-Glucagon (1:200)                                   | Cell Signaling                                         | Cat# 2760; RRID: AB_659831           |
| Mouse anti-Glucagon (1:500)                                    | Abcam                                                  | Cat# ab10988; RRID: AB_297642        |
| Mouse anti-Glucagon- Pacific Blue (1:600; flow cytometry)      | Sigma-Aldrich                                          | Cat# G2654; RRID: AB_259852          |
| Rabbit anti-Insulin-647 (1:65)                                 | Cell Signaling                                         | Cat# 9008                            |
| Guinea pig anti-Insulin (1:1000)                               | Dako                                                   | Cat# A0564                           |
| Chicken anti-Insulin (1:10; flow cytometry)                    | Gallus Immunotech                                      | Cat# ABI                             |
| Rabbit anti-MAFB (1:3000)                                      | Gift from Roland Stein, Vanderbilt University          | Cat# BL1228                          |
| Mouse anti-NKX2.2 (1:1000)                                     | Developmental Studies Hybridoma Bank                   | Cat# 74-5A5; RRID: AB_531794         |
| Rabbit anti-NKX6.1 (1:2000)                                    | BCBC/Palle Serup                                       | N/A                                  |
| Rabbit anti-PDX1 (1:5000)                                      | C. V. E. Wright                                        | N/A                                  |
| Goat anti-PDX1 (1:5000)                                        | C. V. E. Wright                                        | N/A                                  |
| Goat anti-Somatostatin (1:500)                                 | Santa Cruz                                             | Cat# sc-7819; RRID: AB_2302603       |
| Mouse anti-Somatostatin-AlexaFluor 488 (1:200; flow cytometry) | LS Bio                                                 | Cat# LS-C169129-100                  |
| Mouse anti-HIC3-2D12 (Hpa3; 1:200; flow cytometry)             | Gift from Drs. Philip Streeter and Markus Grompe       | N/A                                  |
| Mouse anti-HIC0-4F9-Biotin (Hpi1; 1:100; flow cytometry)       | Novus                                                  | Cat# NBP1-18872B<br>RRID: AB_2126328 |
| Donkey anti-chicken-APC (1:25; flow cytometry)                 | Jackson ImmunoResearch                                 | Cat #703-136-155<br>RRID: AB_2340360 |
| Donkey anti-goat-Alexa Flour 647 (1:200)                       | Jackson ImmunoResearch                                 | Cat #705-605-003<br>RRID: AB_2340436 |
| Donkey anti-Guinea pig-Cy2 (1:500)                             | Jackson ImmunoResearch                                 | Cat #706-225-148<br>RRID: AB_2340467 |
| Donkey anti-Guinea pig-Cy5 (1:200)                             | Jackson ImmunoResearch                                 | Cat #706-175-148<br>RRID: AB_2340462 |
| Donkey anti-mouse-Cy5 (1:200)                                  | Jackson ImmunoResearch                                 | Cat #715-175-151<br>RRID: AB_2340820 |
| Donkey anti-rabbit-Cy3 (1:500)                                 | Jackson ImmunoResearch                                 | Cat #711-165-152<br>RRID: AB_2307443 |
| Goat anti-mouse-PE (1:1000; flow cytometry)                    | BD Biosciences                                         | Cat# 550589<br>RRID: AB_393768       |
| Streptavidin BV421 (1:500; flow cytometry)                     | BD Biosciences                                         | Cat# 563259                          |
| <b>Biological Samples</b>                                      |                                                        |                                      |
| Human Pancreatic Islets (control and T1D)                      | Integrated Islet Distribution Program and Rita Bottino |                                      |
| Human Pancreatic Tissue (control and T1D)                      | Rita Bottino                                           |                                      |

| Chemicals, Peptides, and Recombinant Proteins                    |                                           |                                                                                   |
|------------------------------------------------------------------|-------------------------------------------|-----------------------------------------------------------------------------------|
| Propidium Iodide                                                 | BD Biosciences                            | Cat# 556463                                                                       |
| Exenatide-4 (Ex-4)                                               | California Peptide                        | Cat# 507-77                                                                       |
| L-Arginine monohydrochloride                                     | Sigma Life Science                        | Cat# A6969-25G;<br>CAS: 001119-34-2                                               |
| D-(+)-Glucose                                                    | Sigma Life Science                        | Cat# G7528-1KG;<br>CAS: 50-99-7                                                   |
| 3-Isobutyl-1-methylxanthine (IBMX)                               | Sigma Life Science                        | Cat# I5879-1G; CAS:<br>28822-58-4                                                 |
| (±)-Epinephrine-hydrochloride                                    | Sigma-Aldrich                             | Cat# E4642-5G;<br>CAS: 329-63-5                                                   |
| Potassium Chloride                                               | Fisher Scientific                         | Cat# BP366-500;<br>CAS: 7447-40-7                                                 |
| Collagenase NB1 Premium Grade                                    | Crescent Chemical                         | Cat# 17455.03                                                                     |
| Neutral Protease NB1 Premium Grade                               | Crescent Chemical                         | Cat# 30301.02                                                                     |
| DNase I                                                          | Worthington Biochemical Corporation       | Cat# LS006333                                                                     |
| RPMI Medium                                                      | Mediatech                                 | 99-595-CM                                                                         |
| Biocoll-Separating Solution, Density 1.10 g/mL                   | Cedarlane                                 | Cat# L6155                                                                        |
| Biocoll-Separating Solution, Density 1.077 g/mL                  | Cedarlane                                 | Cat# L6113                                                                        |
| Fetal Calf Serum                                                 | Life Technologies                         | Cat# 16-140-071                                                                   |
| Dithizone                                                        | Sigma                                     | Cat# D5130                                                                        |
| CMRL 1066 Medium                                                 | Mediatech                                 | Cat# 99-663-CV                                                                    |
| Penicillin/Streptomycin mix                                      | Life Technologies                         | Cat# 15140163                                                                     |
| L-glutamine                                                      | Life Technologies                         | Cat# 2030-081                                                                     |
| 16% paraformaldehyde                                             | Electron Microscopy Sciences              | Cat# 15710                                                                        |
| O.C.T. compound                                                  | Fisher Scientific                         | Cat# 4585                                                                         |
| Critical Commercial Assays                                       |                                           |                                                                                   |
| Insulin Radioimmunoassay                                         | Millipore                                 | RI-13K                                                                            |
| Glucagon Radioimmunoassay                                        | Millipore                                 | GL-32K                                                                            |
| RNAqueous-Microkit                                               | Invitrogen by Thermo<br>Fisher Scientific | AM1931                                                                            |
| EIA ELISA                                                        | Phoenix Pharmaceuticals                   | EK-070-94                                                                         |
| Human-specific insulin radioimmunoassay                          | Millipore                                 | HI-14K                                                                            |
| Deposited Data                                                   |                                           |                                                                                   |
| RNA-seq data for FACS purified human control and T1D alpha cells | NCBI Gene Expression Omnibus              | GEO: GSE106148                                                                    |
| Experimental Models: Organisms/Strains                           |                                           |                                                                                   |
| Mouse: NOD-scid-IL2 $\gamma^{null}$ (NSG)                        | Jackson Laboratory                        | <a href="https://www.jax.org/strain/005557">https://www.jax.org/strain/005557</a> |
| Oligonucleotides                                                 |                                           |                                                                                   |
| 18S                                                              | Applied Biosystems                        | Hs99999901_s1                                                                     |
| ACTB                                                             | Applied Biosystems                        | Hs99999903_m1                                                                     |
| ARX                                                              | Applied Biosystems                        | Hs00292465_m1                                                                     |
| GCG                                                              | Applied Biosystems                        | Hs00174967_m1                                                                     |
| INS                                                              | Applied Biosystems                        | Hs02741908_m1                                                                     |
| MAFA                                                             | Applied Biosystems                        | Hs01651425_s1                                                                     |
| MAFB                                                             | Applied Biosystems                        | Hs00534343_s1                                                                     |
| NKX2.2                                                           | Applied Biosystems                        | Hs00159616_m1                                                                     |

|                                                     |                                 |                                                                                                                         |
|-----------------------------------------------------|---------------------------------|-------------------------------------------------------------------------------------------------------------------------|
| NKX6.1                                              | Applied Biosystems              | Hs00232355_m1                                                                                                           |
| PDX1                                                | Applied Biosystems              | Hs00236830_m1                                                                                                           |
| <b>Software and Algorithms</b>                      |                                 |                                                                                                                         |
| TopHat (v2.1)                                       | Trapnell, 2009                  | <a href="http://tophat.cbcb.umd.edu/">http://tophat.cbcb.umd.edu/</a><br>RRID: SCR_013035                               |
| Avadis NGS analysis Platform                        | Strand life Sciences, Bengaluru | <a href="http://www.avadis-ngs.com">http://www.avadis-ngs.com</a><br>RRID: SCR_000644                                   |
| Trimmed Mean of M-values (TMM) algorithm            | Dillies, 2012<br>Robinson, 2010 |                                                                                                                         |
| DAVID (v6.8)                                        | Huang, 2009                     | <a href="http://david.abcc.ncifcrf.gov/">http://david.abcc.ncifcrf.gov/</a><br>RRID: SCR_001881                         |
| Ingenuity Pathway Analysis (IPA)                    | Qiagen                          | RRID: SCR_008653                                                                                                        |
| Prism v.7.0                                         | Graphpad Software               | <a href="https://www.graphpad.com">https://www.graphpad.com</a> ;<br>RRID: SCR_002798                                   |
| MetaMorph 7.1                                       | Molecular Devices               | <a href="https://www.moleculardevices.com">https://www.moleculardevices.com</a> ; RRID: SCR_002368                      |
| Zeiss LSM Imaging Software (confocal)               | Carl Zeiss                      | <a href="https://www.zeiss.com">https://www.zeiss.com</a> ;<br>RRID: SCR_014344                                         |
| Genome Analysis Toolkit (GATK) HaploTypeCaller v3.3 | Broad Institute                 | <a href="https://software.broadinstitute.org/gatk/">https://software.broadinstitute.org/gatk/</a> ;<br>RRID: SCR_001876 |
| <b>Other</b>                                        |                                 |                                                                                                                         |
| Zenon Kit Alexa Fluor 488                           | Invitrogen                      | Cat# Z25002                                                                                                             |
| Zenon Kit Pacific Blue                              | Invitrogen                      | Cat# Z25041                                                                                                             |
| Tyramide Signal Amplification                       | Perkin Elmer                    | Cat# NEL744001KT                                                                                                        |

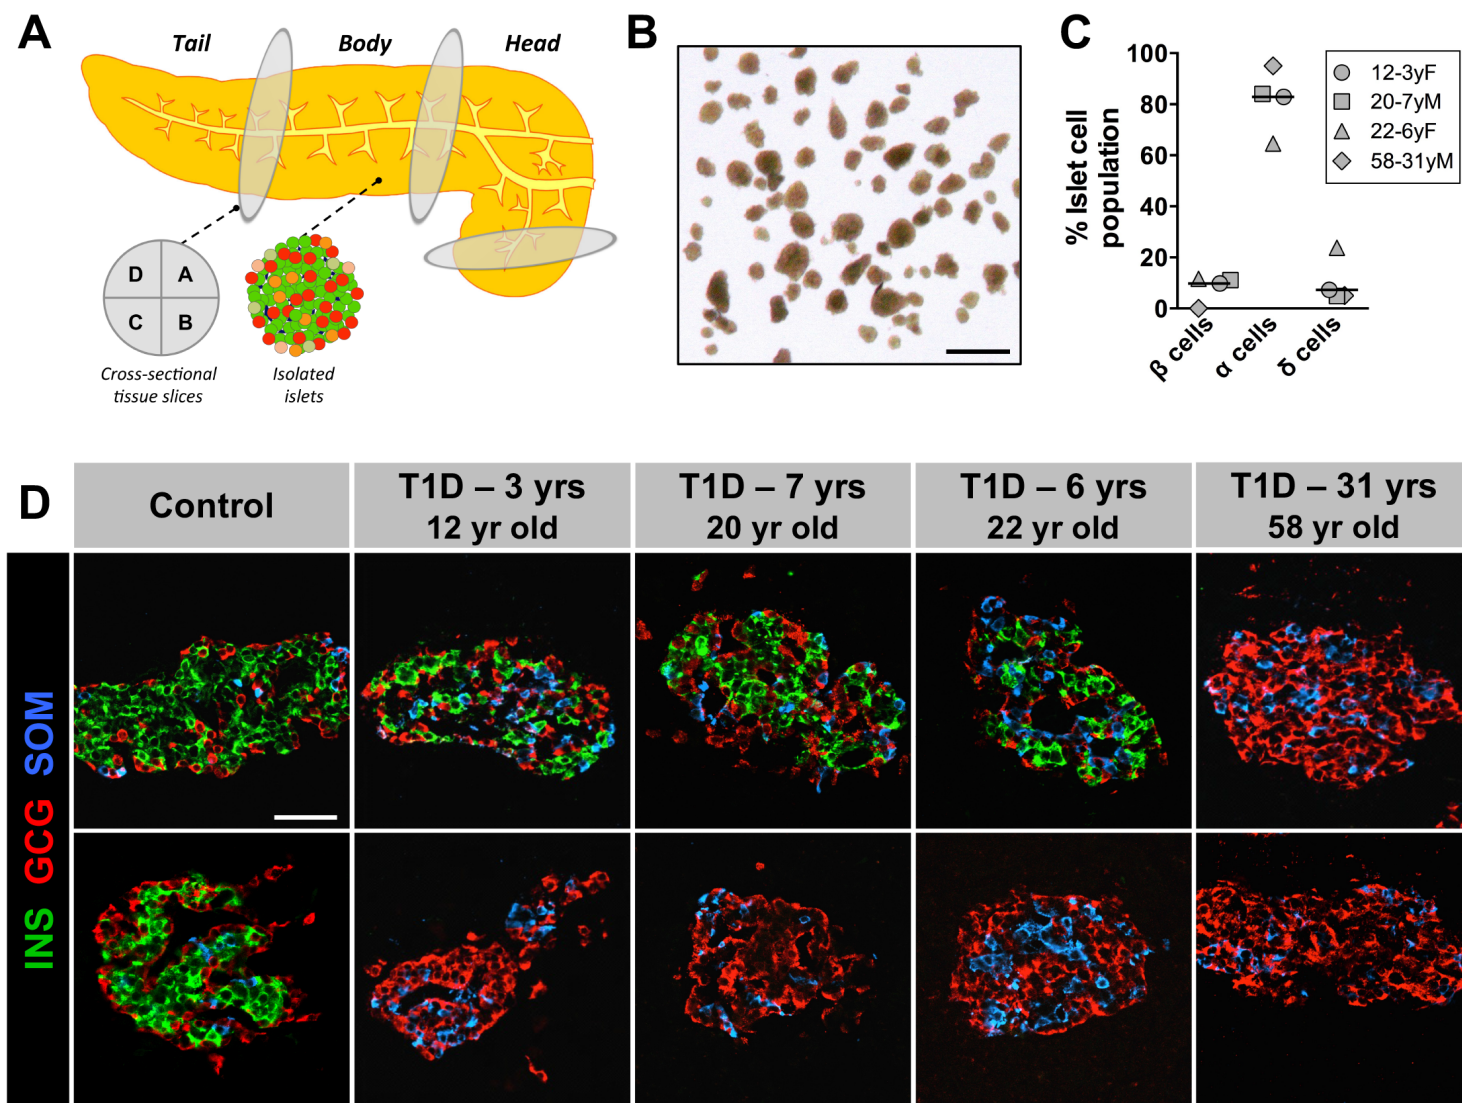

**Figure S1. Related to Figures 1 and 2. Composition and morphology in T1D islets.** (A) Schematic of islet isolation and tissue procurement from the same pancreas. Prior to islet isolation, multiple cross-sectional slices of pancreas with 2-3 mm thickness were obtained from the head, body and tail. Pancreatic slices were further divided into four quadrants (A, B, C, D) and processed for histology. (B) Pancreatic islets procured from a 12-year-old individual with 3-year T1D duration (donor #1). (C) Endocrine cell populations in dispersed isolated islets from 3 donors (#1,4,5) with recent-onset T1D contained  $10.8 \pm 0.5\%$   $\beta$  cells,  $77.1 \pm 6.3\%$   $\alpha$  cells, and  $12.0 \pm 5.9\%$   $\delta$  cells. The donor with longstanding T1D (donor #8) had 0%  $\beta$  cells, 95%  $\alpha$  cells, and 5%  $\delta$  cells. For comparison, islets from normal individuals ( $n=28$ ) with average age of  $36 \pm 2$  years (range 16 – 63 years) assessed by this approach had  $53.4 \pm 2.6\%$   $\beta$  cells,  $38.5 \pm 2.7\%$   $\alpha$  cells, and  $7.5 \pm 0.9\%$   $\delta$  cells (Blodgett et al., 2015). (D) Morphology of T1D islets in the native pancreas. On average 250 islets from pancreatic head, body and tail of each T1D donor were analyzed for the presence of  $\beta$  cells. An islet was categorized as insulin+ even if it had only one insulin-positive cell. The number of insulin+ islets varied in 4 donors (#1,3,4,5) with recent-onset T1D ( $17.8 \pm 15.5\%$ ), but no insulin+ islets were found in the pancreatic sections of our longstanding cases (donors #6,7,8). If donors had insulin+ islets, representative islets are displayed in row 1. INS–insulin, GCG–glucagon, SOM–somatostatin. Scale bar is 50  $\mu\text{m}$ .

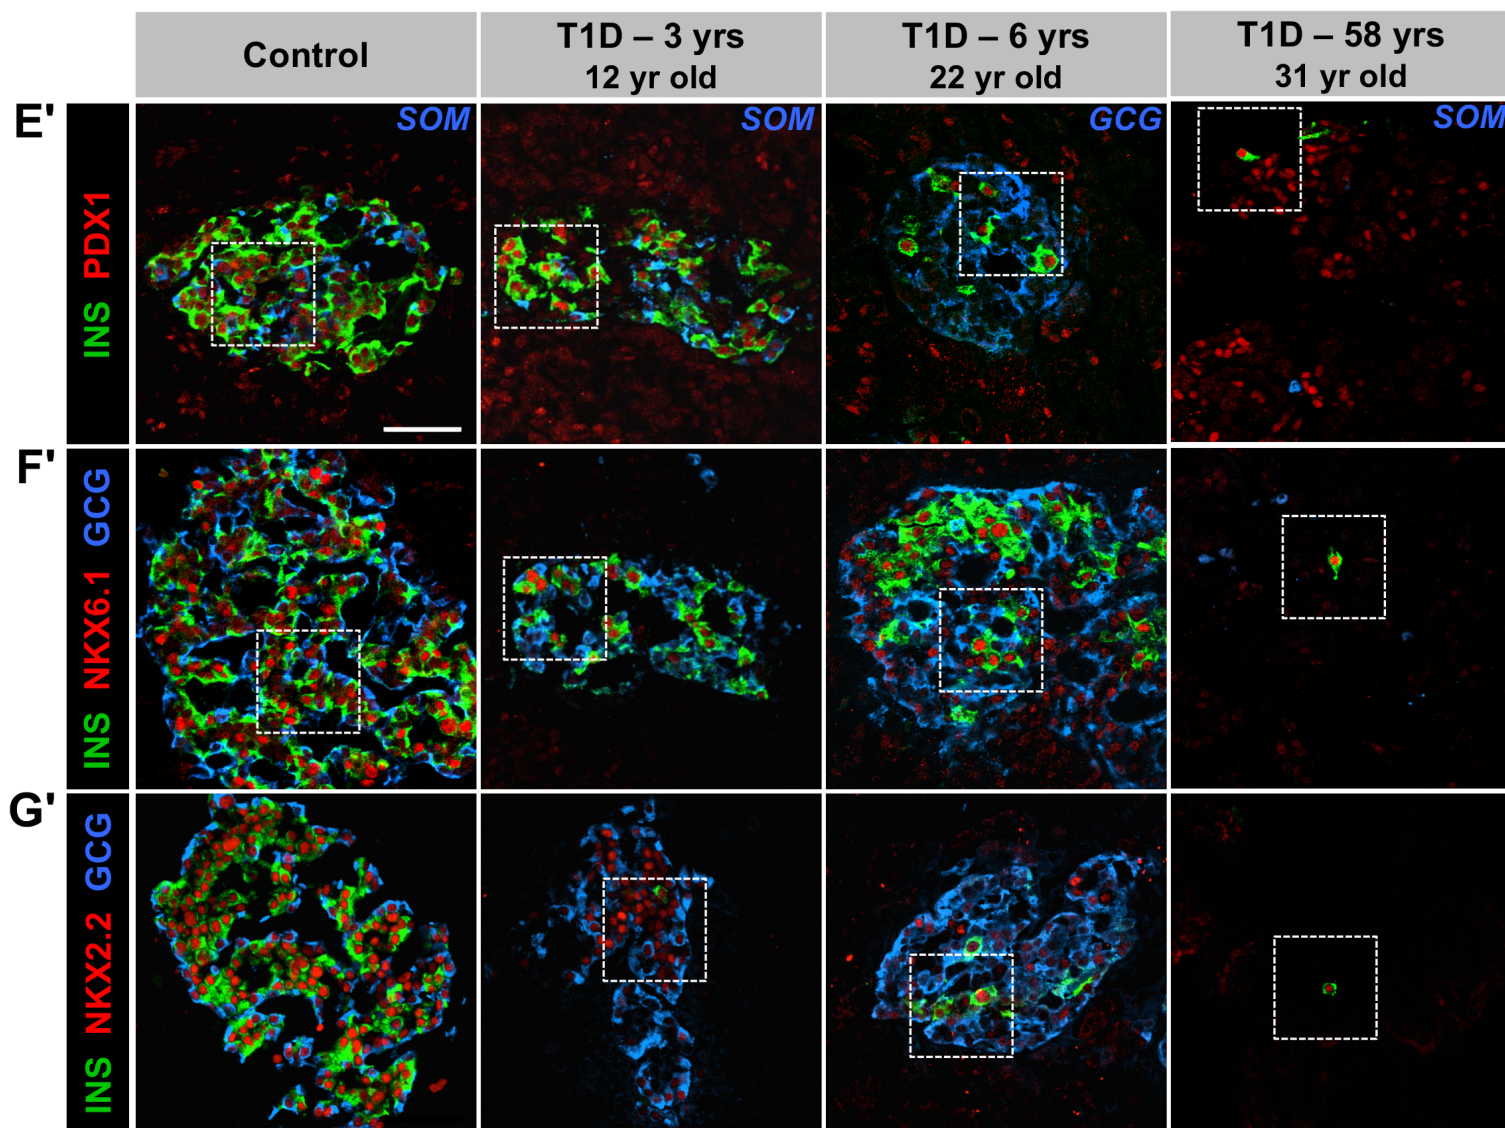

**Figure S2. Related to Figure 1. Expression pattern of PDX1, NKX6.1, and NKX2.2 in T1D  $\beta$  cells.** Expression of  $\beta$  cell-enriched transcription factors in the native pancreatic tissue from donors with recent-onset T1D (donors #1,5) was compared to 58-year-old donor with 31 years of T1D duration (donor #8) and controls. INS–insulin, GCG–glucagon, SOM–somatostatin. Regions denoted by the dashed line in panels **E'–G'** are displayed in panels **E–G** in **Figure 1**, respectively. Scale bar in **E'** is 50  $\mu$ m and also corresponds to panels **F'** and **G'**.

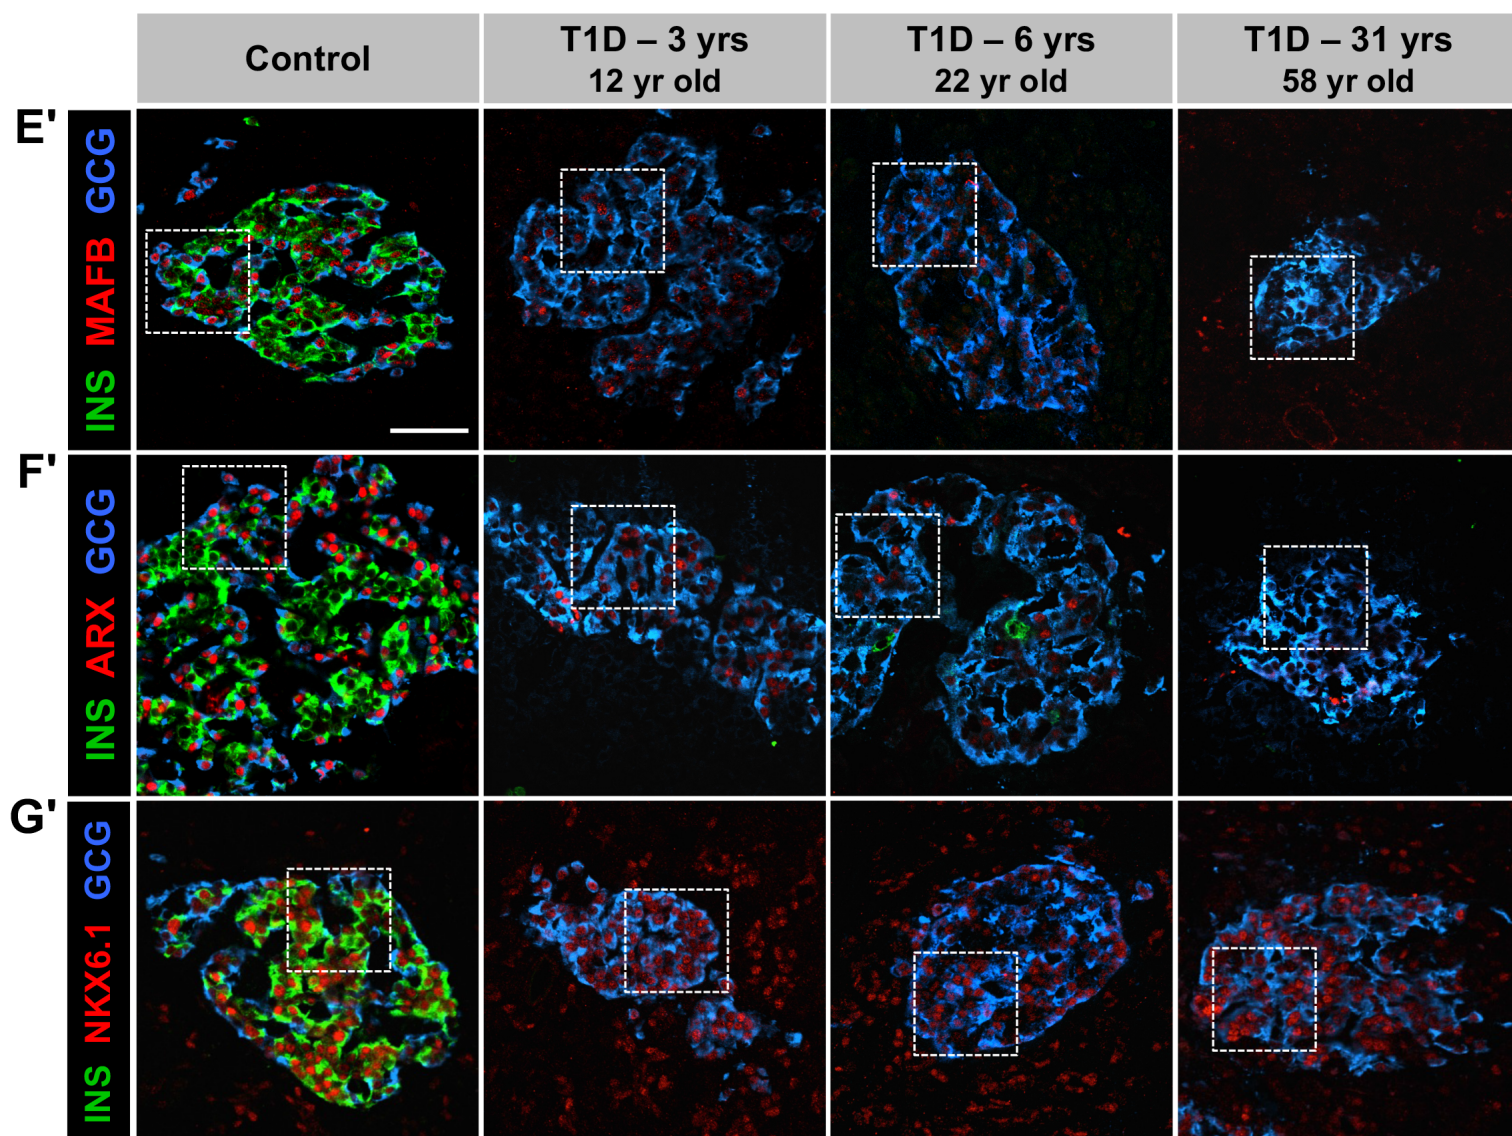

**Figure S3. Related to Figure 2. Expression pattern of MAFB, ARX, and NKX6.1 in T1D  $\alpha$  cells.** Expression of  $\alpha$  cell-enriched transcription factors in the native pancreatic tissue from donors with recent-onset T1D (donors #1,2,5) was compared to 58-year-old donor with 31 years of T1D duration and controls (donor #8). GCG—glucagon, SOM—somatostatin. Regions denoted by the dashed line in panels **E'–G'** are displayed in panels **E–G** in **Figure 2**, respectively. Scale bar in **E'** is 50  $\mu$ m and also corresponds to panels **F'** and **G'**.

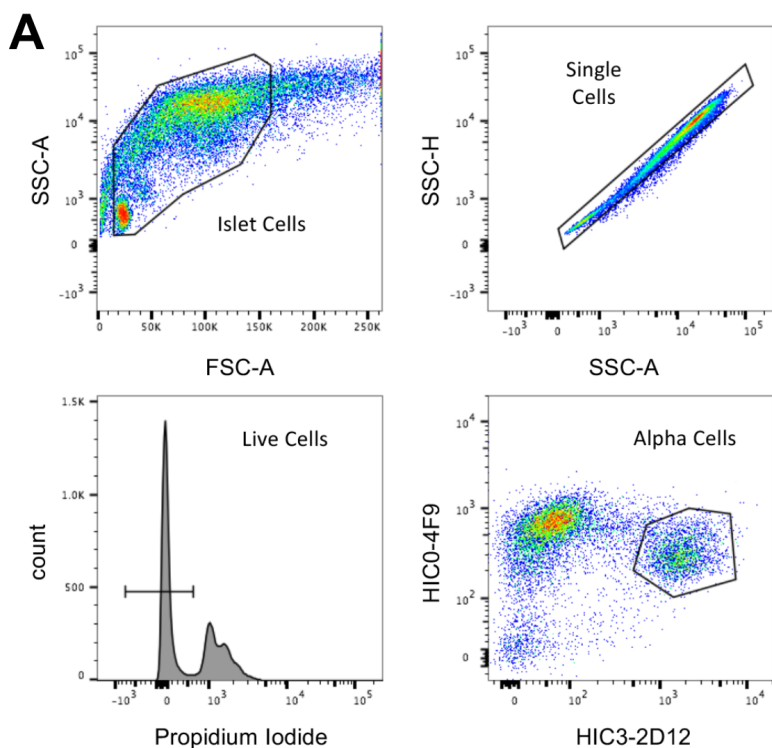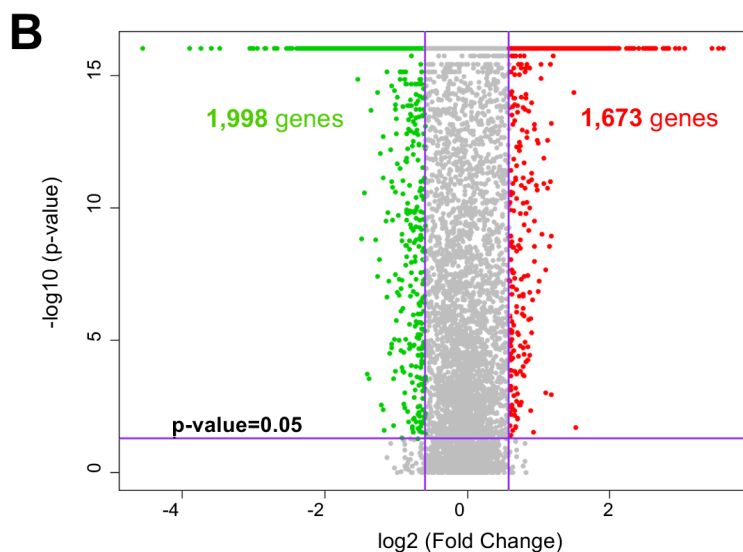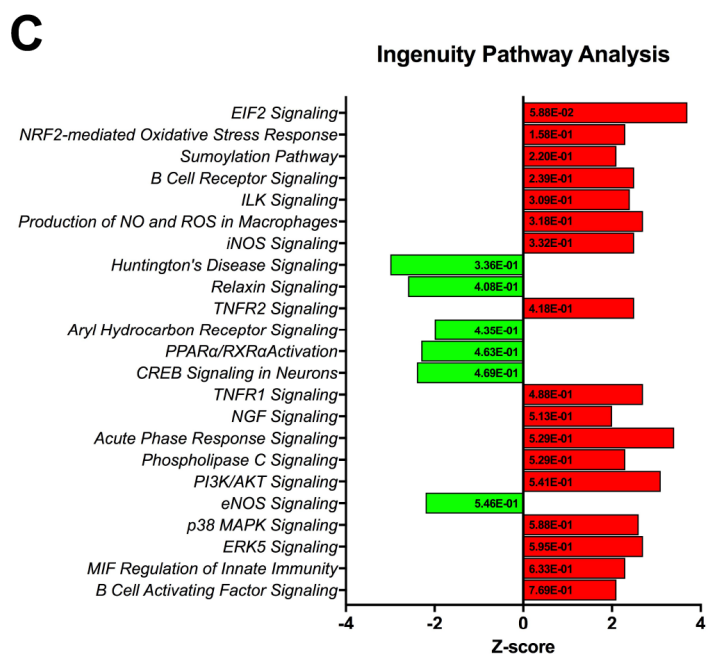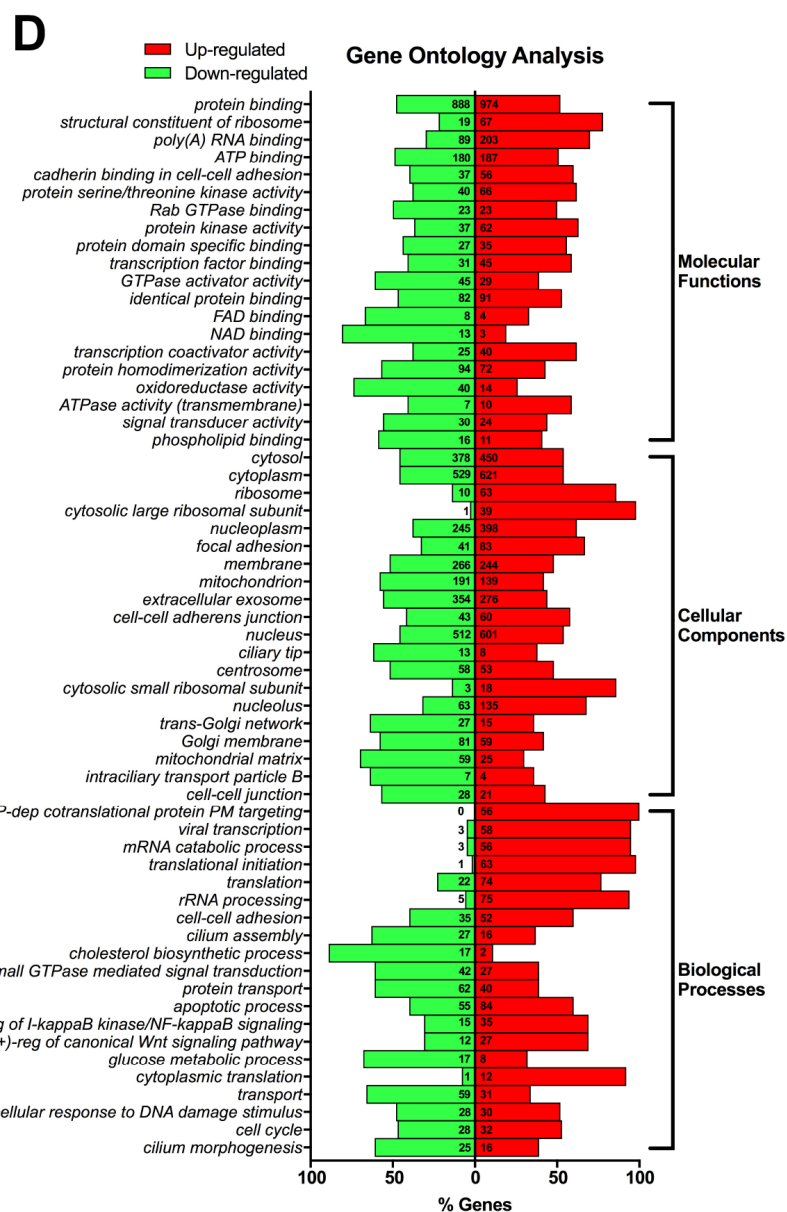

**Figure S4. Related to Figure 4. Transcriptome analysis of purified human  $\alpha$  cells by RNA-sequencing.** (A) Gating strategy for sorting of dispersed human islet cells by Fluorescence Activated Cell Sorting (FACS). Cell debris was excluded by forward scatter (FSC) and side scatter (SSC), single cells were identified by SSC-H v. SSC-A plot, and non-viable cells were excluded using Propidium Iodide (PI). The  $\alpha$  cell population was isolated based on double positivity for HIC3-2D12 (Hpa3) and HIC0-4F9 (Hpi1) antibodies. (B) Volcano plot displays transcripts differentially expressed between control and T1D samples (donors #3,6,7) that reached statistical significance (upregulation: red; downregulation: green). Differential expression between the two sample sets was calculated on the basis of FC ( $\geq 1.5$ ) with a  $<0.05$  p-value cut-off for calculated z-score. (C) Graph represents the top 20 most significantly (z-score  $>2$  or  $<-2$ ) altered canonical pathways identified by Ingenuity Pathway Analysis (IPA) with corresponding p-value depicted on graph bar. Pathways with affiliated Ensembl Gene Stable IDs are listed in **Table S3**. (D) Bar graph highlights the percentage of up- and down-regulated genes (with corresponding gene number displayed within bar) in the top 20 significant biological processes, cellular components, and molecular functions identified by Gene Ontology (GO) term analysis. Corresponding p-values, Ensembl Gene Stable IDs and process GO accession numbers are listed in **Table S4**.

**Table S1. Related to Figures 1-4. Demographic information of normal donors**

| <b>Donors</b>                                | <b>Age (years)</b> | <b>Ethnicity/ Race</b>                    | <b>Gender</b> | <b>BMI</b> | <b>Cause of Death</b>    | <b>Tissue/Islet Source</b> |
|----------------------------------------------|--------------------|-------------------------------------------|---------------|------------|--------------------------|----------------------------|
| <b>Normal Controls for Islet Perifusion</b>  | 7                  | Caucasian                                 | M             | 26.8       | Respiratory arrest       | Rita Bottino               |
|                                              | 8                  | Caucasian                                 | F             | 16.1       | Intracerebral hemorrhage | Rita Bottino               |
|                                              | 8                  | African American                          | M             | 17.2       | Anoxia                   | Rita Bottino               |
|                                              | 9                  | Caucasian                                 | M             | 15.5       | Head Trauma              | Rita Bottino               |
|                                              | 11                 | African American                          | M             | 18.3       | Anoxia                   | Rita Bottino               |
|                                              | 19                 | Caucasian                                 | M             | 20.1       | Head Trauma              | Rita Bottino               |
|                                              | 19                 | Caucasian                                 | M             | 34.1       | Head Trauma              | IIDP                       |
| <b>Normal Controls for Islet Transplants</b> | 20                 | African American                          | M             | 21.7       | Head Trauma              | IIDP                       |
|                                              | 39                 | N/A                                       | F             | 28.2       | N/A                      | IIDP                       |
|                                              | 53                 | Native Hawaiian or Other Pacific Islander | F             | 25.4       | N/A                      | IIDP                       |
| <b>Normal Control for qRT-PCR</b>            | 11                 | Caucasian                                 | M             | 22.7       | Anoxia                   | Rita Bottino               |
|                                              | 20                 | Hispanic/ Latino                          | F             | 24.6       | Anoxia                   | IIDP                       |
|                                              | 29                 | Hispanic/ Latino                          | M             | 27.5       | Head Trauma              | IIDP                       |
| <b>Normal Controls for Histology</b>         | 8                  | African American                          | M             | 17.2       | Anoxia                   | Rita Bottino               |
|                                              | 10                 | Caucasian                                 | M             | 19.3       | Head Trauma              | Rita Bottino               |
|                                              | 19                 | Caucasian                                 | M             | 20.1       | Head Trauma              | Rita Bottino               |
|                                              | 19                 | Caucasian                                 | M             | 21.2       | Anoxia                   | Rita Bottino               |
|                                              | 20                 | Hispanic/ Latino                          | M             | 19.4       | Head Trauma              | Rita Bottino               |
|                                              | 24                 | Caucasian                                 | M             | 35.5       | Head Trauma              | Rita Bottino               |
|                                              | 55                 | African American                          | M             | 35.6       | Stroke                   | Rita Bottino               |
| <b>Normal Controls for RNA-seq</b>           | 26                 | Hispanic/Latino                           | F             | 35.9       | Anoxia                   | IIDP                       |
|                                              | 35                 | Caucasian                                 | F             | 23.6       | Anoxia                   | IIDP                       |
|                                              | 49                 | Caucasian                                 | F             | 31.6       | Stroke                   | IIDP                       |
|                                              | 50                 | African American                          | M             | 30.2       | Stroke                   | IIDP                       |
|                                              | 55                 | Caucasian                                 | M             | 27.8       | Stroke                   | IIDP                       |

N/A – not available; IIDP – Integrated Islet Distribution Program

**Table S2. Related to Figures 1- 4 and Table 1. DNA sequencing of T1D donors for variants associated with monogenic diabetes**

| Donor | Gene           | Chr | Transcript     | Nucleotide  | Amino Acid Change | dbSNP ID    | MAF   | POLY Score |
|-------|----------------|-----|----------------|-------------|-------------------|-------------|-------|------------|
| 1     | <i>AKT2</i>    | 19  | NM_001626.5    | c.*9C>T     | -                 | rs79275829  | 0.004 | 0          |
|       | <i>CYP27B1</i> | 12  | NM_000785.3    | c.963+2T>G  | -                 | -           | 0     | 0          |
|       | <i>CYP27B1</i> | 12  | NM_000785.3    | c.963+7T>G  | -                 | -           | 0     | 0          |
|       | <i>FOXP3</i>   | X   | NM_014009.3    | c.403A>C    | p.Thr135Pro       | -           | 0     | 0          |
|       | <i>IFIH1</i>   | 2   | NM_022168.3    | c.1641+1G>C | -                 | rs35337543  | 0.007 | 0          |
|       | <i>SIRT1</i>   | 10  | NM_012238.4    | c.110C>T    | p.Pro37Leu        | -           | 0     | 0.013      |
|       | <i>GLP1R</i>   | 6   | NM_002062.3    | c.1347G>A   | p.Ala449Ala       | rs201020486 | 0     | 0          |
| 2     | <i>AIRE</i>    | 21  | NM_000383.3    | c.1411C>T   | p.Arg471Cys       | rs74203920  | 0.006 | 0.997      |
|       | <i>ALMS1</i>   | 2   | NM_015120.4    | c.69_77del  | p.Glu27_Glu29del  | -           | 0     | 0          |
|       | <i>HSD11B1</i> | 1   | NM_005525.3    | c.219+6G>A  | -                 | rs202219444 | 0     | 0          |
|       | <i>LRBA</i>    | 4   | NM_006726.4    | c.1536A>G   | p.Ser512Ser       | -           | 0     | 0          |
|       | <i>POMC</i>    | 2   | NM_001035256.1 | c.706C>G    | p.Arg236Gly       | rs28932472  | 0.004 | 1          |
|       | <i>PTPN22</i>  | 1   | NM_015967.5    | c.1508A>G   | p.Tyr503Cys       | rs371916399 | 0     | 0.004      |
|       | <i>TBC1D4</i>  | 13  | NM_014832.3    | c.2913A>T   | p.Gly971Gly       | rs184774790 | 0     | 0          |
| 3     | <i>BBS5</i>    | 2   | NM_152384.2    | c.620G>A    | p.Arg207His       | rs35487251  | 0.006 | 0.833      |
|       | <i>BLM</i>     | 15  | NM_000057.3    | c.2119C>T   | p.Pro707Ser       | rs146077918 | 0.001 | 0.018      |
|       | <i>EIF2AK3</i> | 2   | NM_004836.5    | c.-201A>G   | -                 | rs144057685 | 0.005 | 0          |
|       | <i>HFE</i>     | 6   | NM_000410.3    | c.845G>A    | p.Cys282Tyr       | rs1800562   | 0.02  | 0          |
|       | <i>HNF4A</i>   | 20  | NM_175914.4    | c.1314C>G   | p.Leu438Leu       | -           | 0     | 0          |
|       | <i>PIK3R1</i>  | 5   | NM_181523.2    | c.1176C>T   | p.Phe392Phe       | rs3730090   | 0.308 | 0          |
| 4     | <i>ALMS1</i>   | 2   | NM_015120.4    | c.12278G>A  | p.Arg4093His      | -           | 0     | 0          |
|       | <i>FBN1</i>    | 15  | NM_000138.4    | c.3294C>T   | p.Asp1098Asp      | rs140587    | 0.008 | 0          |
|       | <i>GLP1R</i>   | 6   | NM_002062.3    | c.59G>A     | p.Arg20Lys        | rs10305421  | 0.007 | 0.643      |
|       | <i>IFIH1</i>   | 2   | NM_022168.3    | c.1075G>C   | p.Val359Leu       | -           | 0     | 0.996      |
|       | <i>MKS1</i>    | 17  | NM_017777.3    | c.1528C>T   | p.Arg510Trp       | -           | 0     | 0.976      |

|   |                |    |             |                |              |             |       |         |
|---|----------------|----|-------------|----------------|--------------|-------------|-------|---------|
| 5 | <i>BLM</i>     | 15 | NM_000057.3 | c.2268A>G      | p.Lys756Lys  | rs146013879 | 0.001 | 0       |
|   | <i>CLEC16A</i> | 16 | NM_015226.2 | c.2945G>A      | p.Ser982Asn  | rs72650689  | 0.004 | 0.967   |
|   | <i>HFE</i>     | 6  | NM_000410.3 | c.187C>G       | p.His63Asp   | rs1799945   | 0.084 | 0       |
|   | <i>LRBA</i>    | 4  | NM_006726.4 | c.7597A>C      | p.Thr2533Pro | rs62346982  | 0.003 | 0.167   |
|   | <i>KCNK16</i>  | 6  | NM_032115.3 | c.165G>A       | p.Leu55Leu   | rs138076469 | 0.002 | 0       |
|   | <i>LMNA</i>    | 1  | NM_005572.3 | c.612G>A       | p.Leu204Leu  | rs12117552  | 0.004 | 0       |
| 6 | <i>ABCC8</i>   | 11 | NM_000352.4 | c.-430C>T      | -            | -           | 0     | 0       |
|   | <i>BBS2</i>    | 16 | NM_031885.3 | c.155T>A       | p.Val52Asp   | -           | 0     | 0.016   |
|   | <i>EIF2AK3</i> | 2  | NM_004836.5 | c.-201A>G      | -            | rs144057685 | 0.005 | 0       |
|   | <i>MKKS</i>    | 20 | NM_018848.3 | c.1015A>G      | p.Ile339Val  | rs137853909 | 0.001 | 0.008   |
|   | <i>NTRK2</i>   | 9  | NM_006180.4 | c.483T>G       | p.Thr161Thr  | rs199849633 | 0     | 0       |
|   | <i>VPS13B</i>  | 8  | NM_017890.4 | c.8978A>G      | p.Asn2993Ser | rs28940272  | 0.002 | 0.997   |
| 7 | <i>ABCC8</i>   | 11 | NM_000352.4 | c.2176G>A      | p.Ala726Thr  | rs138687850 | 0.001 | 0.02634 |
|   | <i>AKT2</i>    | 19 | NM_001626.5 | c.1110G>T      | p.Pro370Pro  | rs41309435  | 0.001 | 0       |
|   | <i>CFTR</i>    | 7  | NM_000492.3 | c.1521_1523del | p.Phe508del  | rs199826652 | 0.006 | 0       |
|   | <i>LRBA</i>    | 4  | NM_006726.4 | c.217-10del    | -            | -           | 0     | 0       |
|   | <i>VPS13B</i>  | 8  | NM_017890.4 | c.1832G>A      | p.Arg611Lys  | rs61754109  | 0     | 0.02634 |
| 8 | <i>AKT2</i>    | 19 | NM_001626.5 | c.945G>A       | p.Glu315Glu  | rs150000674 | 0.002 | 0       |
|   | <i>CYP27B1</i> | 12 | NM_000785.3 | c.963+2T>G     | -            | -           | 0     | 0       |
|   | <i>CYP27B1</i> | 12 | NM_000785.3 | c.963+7T>G     | -            | -           | 0     | 0       |
|   | <i>FXN</i>     | 9  | NM_000144.4 | c.-7G>A        | -            | rs145006100 | 0.011 | 0       |
|   | <i>IFIH1</i>   | 2  | NM_022168.3 | c.1641+1G>C    | -            | rs35337543  | 0.007 | 0       |

Chr – Chromosome, MAF – Minor allele frequency; DNA isolated from pancreatic samples of T1D donors was subjected to DNA sequencing covering coding regions and splice junctions of 148 genes associated with monogenic diabetes.

## SUPPLEMENTAL REFERENCES

- Aamodt, K.I. et al., 2016. Development of a reliable automated screening system to identify small molecules and biologics that promote human  $\beta$ -cell regeneration. *American journal of physiology Endocrinology and metabolism*, 311(5), pp.E859–E868.
- Alkorta-Aranburu, G. et al., 2016. Improved molecular diagnosis of patients with neonatal diabetes using a combined next-generation sequencing and MS-MLPA approach. *Journal of pediatric endocrinology & metabolism : JPEM*, 29(5), pp.523–531.
- Benjamini, Y. & Hochberg, Y., 1995. A direct approach to false discovery rates. *J. Royal Stat. Soc., Ser. B*, 57(1), pp.289–300.
- Blodgett, D.M. et al., 2015. Novel Observations From Next-Generation RNA Sequencing of Highly Purified Human Adult and Fetal Islet Cell Subsets. *Diabetes*, 64(9), pp.3172–3181.
- Brissova, M. et al., 2014. Islet microenvironment, modulated by vascular endothelial growth factor-A signaling, promotes  $\beta$  cell regeneration. *Cell metabolism*, 19(3), pp.498–511.
- Dillies, M.-A. et al., 2012. A comprehensive evaluation of normalization methods for Illumina high-throughput RNA sequencing data analysis. *Briefings in bioinformatics*.
- Dorrell, C. et al., 2016. Human islets contain four distinct subtypes of  $\beta$  cells. *Nature communications*, 7, p.11756.
- Huang, D.W. et al., 2009. Extracting biological meaning from large gene lists with DAVID. *Current protocols in bioinformatics*, Chapter 13, p.Unit 13.11.
- Kayton, N.S. et al., 2015. Human islet preparations distributed for research exhibit a variety of insulin-secretory profiles. *American journal of physiology Endocrinology and metabolism*, 308(7), pp.E592–602.
- Malone, J.H. & Oliver, B., 2011. Microarrays, deep sequencing and the true measure of the transcriptome. *BMC biology*, 9, p.34.
- Robinson, M.D. & Oshlack, A., 2010. A scaling normalization method for differential expression analysis of RNA-seq data. *Genome biology*, 11(3), p.R25.
- Trapnell, C., Pachter, L. & Salzberg, S.L., 2009. TopHat: discovering splice junctions with RNA-Seq. *Bioinformatics (Oxford, England)*, 25(9), pp.1105–1111.
